# Supplementary material
Source: PubMed Central journal article supplement (PMC5419464)

## SUPPLEMENTAL MATERIAL

### **Bivariate Analysis of Age-Related Macular Degeneration Progression Using Genetic Risk Scores**

Ying Ding,<sup>†</sup> Yi Liu,<sup>†,§</sup> Qi Yan,<sup>§</sup> Lars G. Fritsche,<sup>‡</sup> Richard J. Cook,<sup>††</sup> Traci Clemons,<sup>§§</sup> Rinki Ratnapriya,<sup>‡‡</sup> Michael L. Klein,<sup>+</sup> Gonçalo R. Abecasis,<sup>‡</sup> Anand Swaroop,<sup>‡‡</sup> Emily Y. Chew,<sup>++</sup> Daniel E. Weeks,<sup>\*,†</sup> Wei Chen,<sup>†,§,\*</sup>

<sup>†</sup>Department of Biostatistics, Graduate School of Public Health, University of Pittsburgh, Pittsburgh, PA;

<sup>§</sup>Division of Pulmonary Medicine, Allergy and Immunology, Department of Pediatrics, Children's Hospital of Pittsburgh of UPMC, University of Pittsburgh, Pittsburgh, PA;

<sup>‡</sup>Department of Biostatistics, Center for Statistical Genetics, University of Michigan, Ann Arbor, MI;

<sup>††</sup>Department of Statistics and Actuarial Science, University of Waterloo, Canada;

<sup>§§</sup>The EMMES Corporation, Rockville, MD;

<sup>‡‡</sup>Neurobiology Neurodegeneration and Repair Laboratory, National Eye Institute, National Institutes of Health, Bethesda, MD;

<sup>+</sup>Casey Eye Institute, Oregon Health & Science University, Portland, Oregon;

<sup>++</sup>Division of Epidemiology and Clinical Applications, National Eye Institute, National Institutes of Health, Bethesda, MD;

<sup>\*</sup>Department of Human Genetics, Graduate School of Public Health, University of Pittsburgh, PA

Table S1: Multivariable robust Cox model<sup>1</sup> results for the 34 top AMD risk variants on progression to choroidal neovascularization (CNV).

| Variant     | Chr | Major/<br>minor<br>allele | Locus name <sup>2</sup> | Effect on<br>Progression<br>(AREDS) |                       | Effect on<br>Progression<br>(AREDS2) |                      |
|-------------|-----|---------------------------|-------------------------|-------------------------------------|-----------------------|--------------------------------------|----------------------|
|             |     |                           |                         | HR                                  | <i>p</i>              | HR                                   | <i>p</i>             |
| rs10922109  | 1   | C/A                       | <i>CFH</i>              | 0.60                                | 1.40x10 <sup>-8</sup> | 1.18                                 | 6.1x10 <sup>-2</sup> |
| rs11884770  | 2   | C/T                       | <i>COL4A3</i>           | 1.09                                | 0.33                  | 0.80                                 | 7.1x10 <sup>-3</sup> |
| rs62247658  | 3   | T/C                       | <i>ADAMTS9-AS2</i>      | 1.00                                | 0.95                  | 0.90                                 | 0.14                 |
| rs140647181 | 3   | T/C                       | <i>COL8A1</i>           | 2.29                                | 4.5x10 <sup>-3</sup>  | 0.88                                 | 0.73                 |
| rs10033900  | 4   | C/T                       | <i>CFI</i>              | 1.00                                | 0.96                  | 0.88                                 | 6.3x10 <sup>-2</sup> |
| rs62358361  | 5   | G/T                       | <i>C9</i>               | 0.86                                | 0.66                  | 0.40                                 | 4.5x10 <sup>-3</sup> |
| rs114092250 | 5   | G/A                       | <i>PRLR/SPEF2</i>       | 0.44                                | 0.02                  | 0.92                                 | 0.79                 |
| rs116503776 | 6   | G/A                       | <i>C2/CFB/SKIV2L</i>    | 0.72                                | 1.4x10 <sup>-2</sup>  | 1.03                                 | 0.82                 |
| rs943080    | 6   | T/C                       | <i>VEGFA</i>            | 0.95                                | 0.45                  | 0.94                                 | 0.39                 |
| rs7803454   | 7   | C/T                       | <i>PILRB/PILRA</i>      | 1.01                                | 0.95                  | 1.09                                 | 0.33                 |
| rs1142      | 7   | C/T                       | <i>KMT2E/SRPK2</i>      | 1.03                                | 0.68                  | 1.07                                 | 0.35                 |
| rs79037040  | 8   | T/G                       | <i>TNFRSF10A</i>        | 0.94                                | 0.43                  | 0.96                                 | 0.56                 |
| rs71507014  | 9   | GC/G                      | <i>TRPM3</i>            | 0.99                                | 0.87                  | 0.93                                 | 0.33                 |
| rs10781182  | 9   | G/T                       | <i>MIR6130/RORB</i>     | 0.85                                | 3.6x10 <sup>-2</sup>  | 0.94                                 | 0.42                 |
| rs1626340   | 9   | G/A                       | <i>TGFBR1</i>           | 0.85                                | 0.11                  | 0.89                                 | 0.22                 |
| rs2740488   | 9   | A/C                       | <i>ABCA1</i>            | 0.96                                | 0.60                  | 1.00                                 | 1.0                  |
| rs12357257  | 10  | G/A                       | <i>ARHGAP21</i>         | 1.05                                | 0.57                  | 1.03                                 | 0.68                 |
| rs3750846   | 10  | T/C                       | <i>ARMS2/HTRA1</i>      | 1.57                                | 3.2x10 <sup>-9</sup>  | 1.37                                 | 2.1x10 <sup>-6</sup> |
| rs3138141   | 12  | C/A                       | <i>RDH5/CD63</i>        | 1.25                                | 5.3x10 <sup>-2</sup>  | 0.98                                 | 0.87                 |
| rs61941274  | 12  | G/A                       | <i>ACAD10</i>           | 0.97                                | 0.91                  | 1.20                                 | 0.54                 |
| rs9564692   | 13  | C/T                       | <i>B3GALTL</i>          | 0.76                                | 2.3x10 <sup>-3</sup>  | 0.94                                 | 0.46                 |
| rs61985136  | 14  | T/C                       | <i>RAD51B</i>           | 1.17                                | 4.2x10 <sup>-2</sup>  | 1.00                                 | 1.0                  |
| rs2043085   | 15  | T/C                       | <i>LIPC</i>             | 1.15                                | 7.4x10 <sup>-2</sup>  | 0.99                                 | 0.91                 |
| rs5817082   | 16  | C/CA                      | <i>CETP</i>             | 0.87                                | 9.7x10 <sup>-2</sup>  | 1.00                                 | 0.98                 |
| rs72802342  | 16  | C/A                       | <i>CTRB2/CTRB1</i>      | 0.81                                | 0.21                  | 0.93                                 | 0.66                 |
| rs11080055  | 17  | C/A                       | <i>TMEM97/VTN</i>       | 1.16                                | 4.9x10 <sup>-2</sup>  | 1.16                                 | 0.04                 |
| rs6565597   | 17  | C/T                       | <i>NPLOC4/TSPAN10</i>   | 1.14                                | 9.5x10 <sup>-2</sup>  | 1.08                                 | 0.31                 |
| rs67538026  | 19  | C/T                       | <i>CNN2</i>             | 0.89                                | 0.14                  | 0.91                                 | 0.29                 |
| rs2230199   | 19  | C/G                       | <i>C3</i>               | 0.82                                | 2.6x10 <sup>-2</sup>  | 1.06                                 | 0.48                 |
| rs429358    | 19  | T/C                       | <i>APOE</i>             | 0.96                                | 0.70                  | 0.93                                 | 0.57                 |
| rs142450006 | 20  | TTTTTC/T                  | <i>MMP9</i>             | 0.65                                | 6.3x10 <sup>-4</sup>  | 0.71                                 | 3.8x10 <sup>-3</sup> |
| rs201459901 | 20  | T/TA                      | <i>C20orf85</i>         | 0.95                                | 0.74                  | 0.87                                 | 0.41                 |
| rs5754227   | 22  | T/C                       | <i>SYN3/TIMP3</i>       | 0.88                                | 0.27                  | 0.63                                 | 1.8x10 <sup>-4</sup> |
| rs8135665   | 22  | C/T                       | <i>SLC16A8</i>          | 0.92                                | 0.35                  | 0.98                                 | 0.83                 |

<sup>1</sup>: Model was adjusted for baseline age, education, smoking status and study eye's baseline AMD severity score.

<sup>2</sup>: The locus name identifies the nearest gene(s), but does not necessarily identify the responsible gene

Table S2: Multivariable robust Cox model results for the 34 top AMD risk variants on progression to geographic atrophy (GA).

| Variant     | Chr | Major/<br>minor<br>allele | Locus name            | Effect on<br>Progression<br>(AREDS) |                      | Effect on<br>Progression<br>(AREDS2) |                      |
|-------------|-----|---------------------------|-----------------------|-------------------------------------|----------------------|--------------------------------------|----------------------|
|             |     |                           |                       | HR                                  | <i>p</i>             | HR                                   | <i>p</i>             |
| rs10922109  | 1   | C/A                       | <i>CFH</i>            | 0.70                                | 1.9x10 <sup>-5</sup> | 1.01                                 | 0.96                 |
| rs11884770  | 2   | C/T                       | <i>COL4A3</i>         | 0.95                                | 0.52                 | 0.88                                 | 0.11                 |
| rs62247658  | 3   | T/C                       | <i>ADAMTS9-AS2</i>    | 1.16                                | 3.7x10 <sup>-2</sup> | 0.85                                 | 2.2x10 <sup>-2</sup> |
| rs140647181 | 3   | T/C                       | <i>COL8A1</i>         | 1.19                                | 0.70                 | 1.02                                 | 0.94                 |
| rs10033900  | 4   | C/T                       | <i>CFI</i>            | 0.96                                | 0.56                 | 0.94                                 | 0.39                 |
| rs62358361  | 5   | G/T                       | <i>C9</i>             | 1.10                                | 0.77                 | 0.82                                 | 0.41                 |
| rs114092250 | 5   | G/A                       | <i>PRLR/SPEF2</i>     | 0.67                                | 7.2x10 <sup>-2</sup> | 0.97                                 | 0.91                 |
| rs116503776 | 6   | G/A                       | <i>C2/CFB/SKIV2L</i>  | 0.69                                | 2.3x10 <sup>-4</sup> | 0.84                                 | 0.19                 |
| rs943080    | 6   | T/C                       | <i>VEGFA</i>          | 0.95                                | 0.40                 | 0.99                                 | 0.87                 |
| rs7803454   | 7   | C/T                       | <i>PILRB/PILRA</i>    | 0.97                                | 0.68                 | 1.37                                 | 4.1x10 <sup>-4</sup> |
| rs1142      | 7   | C/T                       | <i>KMT2E/SRPK2</i>    | 0.97                                | 0.72                 | 1.03                                 | 0.69                 |
| rs79037040  | 8   | T/G                       | <i>TNFRSF10A</i>      | 0.91                                | 0.15                 | 0.94                                 | 0.41                 |
| rs71507014  | 9   | GC/G                      | <i>TRPM3</i>          | 1.00                                | 0.96                 | 0.84                                 | 8.6x10 <sup>-3</sup> |
| rs10781182  | 9   | G/T                       | <i>MIR6130/RORB</i>   | 0.87                                | 6.1x10 <sup>-2</sup> | 0.84                                 | 0.015                |
| rs1626340   | 9   | G/A                       | <i>TGFBR1</i>         | 0.97                                | 0.73                 | 0.97                                 | 0.69                 |
| rs2740488   | 9   | A/C                       | <i>ABCA1</i>          | 0.99                                | 0.93                 | 1.07                                 | 0.41                 |
| rs12357257  | 10  | G/A                       | <i>ARHGAP21</i>       | 1.07                                | 0.38                 | 1.17                                 | 0.05                 |
| rs3750846   | 10  | T/C                       | <i>ARMS2/HTRA1</i>    | 1.49                                | 2.1x10 <sup>-8</sup> | 1.19                                 | 1.4x10 <sup>-2</sup> |
| rs3138141   | 12  | C/A                       | <i>RDH5/CD63</i>      | 1.24                                | 0.04                 | 0.89                                 | 0.33                 |
| rs61941274  | 12  | G/A                       | <i>ACAD10</i>         | 1.17                                | 0.57                 | 0.95                                 | 0.87                 |
| rs9564692   | 13  | C/T                       | <i>B3GALTL</i>        | 0.83                                | 1.9x10 <sup>-2</sup> | 0.92                                 | 0.29                 |
| rs61985136  | 14  | T/C                       | <i>RAD51B</i>         | 1.18                                | 3.4x10 <sup>-2</sup> | 0.95                                 | 0.53                 |
| rs2043085   | 15  | T/C                       | <i>LIPC</i>           | 1.20                                | 1.1x10 <sup>-2</sup> | 1.00                                 | 0.95                 |
| rs5817082   | 16  | C/CA                      | <i>CETP</i>           | 0.91                                | 0.24                 | 1.14                                 | 0.12                 |
| rs72802342  | 16  | C/A                       | <i>CTRB2/CTRB1</i>    | 0.69                                | 3.5x10 <sup>-2</sup> | 0.78                                 | 0.11                 |
| rs11080055  | 17  | C/A                       | <i>TMEM97/VTN</i>     | 1.11                                | 0.11                 | 1.03                                 | 0.70                 |
| rs6565597   | 17  | C/T                       | <i>NPLOC4/TSPAN10</i> | 1.00                                | 0.97                 | 0.96                                 | 0.57                 |
| rs67538026  | 19  | C/T                       | <i>CNN2</i>           | 0.86                                | 4.4x10 <sup>-2</sup> | 0.83                                 | 2.9x10 <sup>-2</sup> |
| rs2230199   | 19  | C/G                       | <i>C3</i>             | 0.87                                | 8.7x10 <sup>-2</sup> | 0.91                                 | 0.20                 |
| rs429358    | 19  | T/C                       | <i>APOE</i>           | 0.89                                | 0.35                 | 1.11                                 | 0.37                 |
| rs142450006 | 20  | TTTTTC/T                  | <i>MMP9</i>           | 0.82                                | 8.3x10 <sup>-2</sup> | 0.76                                 | 1.3x10 <sup>-2</sup> |
| rs201459901 | 20  | T/TA                      | <i>C20orf85</i>       | 1.16                                | 0.24                 | 0.88                                 | 0.45                 |
| rs5754227   | 22  | T/C                       | <i>SYN3/TIMP3</i>     | 0.95                                | 0.59                 | 0.81                                 | 4.7x10 <sup>-2</sup> |
| rs8135665   | 22  | C/T                       | <i>SLC16A8</i>        | 1.01                                | 0.86                 | 1.05                                 | 0.57                 |

Table S3: AUC<sup>1</sup> values (with 5-fold cross validation SD in parenthesis for AREDS data) for different prediction models evaluated in all (evaluable) eyes.

| Model <sup>2</sup> | AREDS            |                   |                                  | AREDS2               |                  |                     |
|--------------------|------------------|-------------------|----------------------------------|----------------------|------------------|---------------------|
|                    | 4 yr<br>(n=5000) | 10 yr<br>(n=4126) | iAUC <sup>2</sup><br>(up to 4yr) | iAUC<br>(up to 10yr) | 4 yr<br>(n=2633) | iAUC<br>(up to 4yr) |
| <b>A</b>           | 0.678<br>(0.025) | 0.669<br>(0.034)  | 0.676<br>(0.054)                 | 0.672<br>(0.042)     | 0.635            | 0.617               |
| <b>B</b>           | 0.739<br>(0.041) | 0.774<br>(0.043)  | 0.767<br>(0.046)                 | 0.769<br>(0.043)     | 0.632            | 0.618               |
| <b>C</b>           | 0.906<br>(0.010) | 0.915<br>(0.013)  | 0.905<br>(0.020)                 | 0.909<br>(0.013)     | 0.756            | 0.744               |
| <b>D</b>           | 0.913<br>(0.009) | 0.920<br>(0.013)  | 0.908<br>(0.018)                 | 0.914<br>(0.013)     | 0.773            | 0.755               |
| <b>E</b>           | 0.908<br>(0.010) | 0.922<br>(0.015)  | 0.905<br>(0.021)                 | 0.912<br>(0.014)     | 0.762            | 0.742               |

Table S4: AUC values (with 5-fold cross validation SD in parenthesis for AREDS data) for different prediction models evaluated in (evaluable) eyes with baseline severity score greater than 3.

| Model    | AREDS            |                   |                     | AREDS2               |                  |                     |
|----------|------------------|-------------------|---------------------|----------------------|------------------|---------------------|
|          | 4 yr<br>(n=1888) | 10 yr<br>(n=1657) | iAUC<br>(up to 4yr) | iAUC<br>(up to 10yr) | 4 yr<br>(n=2520) | iAUC<br>(up to 4yr) |
| <b>A</b> | 0.626<br>(0.016) | 0.601<br>(0.034)  | 0.619<br>(0.063)    | 0.619<br>(0.061)     | 0.631            | 0.612               |
| <b>B</b> | 0.638<br>(0.030) | 0.669<br>(0.038)  | 0.681<br>(0.051)    | 0.670<br>(0.058)     | 0.625            | 0.611               |
| <b>C</b> | 0.787<br>(0.034) | 0.785<br>(0.017)  | 0.806<br>(0.037)    | 0.786<br>(0.035)     | 0.749            | 0.738               |
| <b>D</b> | 0.802<br>(0.033) | 0.795<br>(0.016)  | 0.816<br>(0.037)    | 0.797<br>(0.034)     | 0.766            | 0.748               |
| <b>E</b> | 0.788<br>(0.041) | 0.803<br>(0.019)  | 0.817<br>(0.034)    | 0.797<br>(0.035)     | 0.757            | 0.738               |

<sup>1</sup>: these prediction models were established using AREDS data and evaluated on both AREDS (5-fold cross validation) and AREDS2.

<sup>2</sup>: predictors for each model are listed in Table 6.

<sup>3</sup>: iAUC: integrated AUC

Figure S1: Distribution plot on baseline age in AREDS and AREDS2.

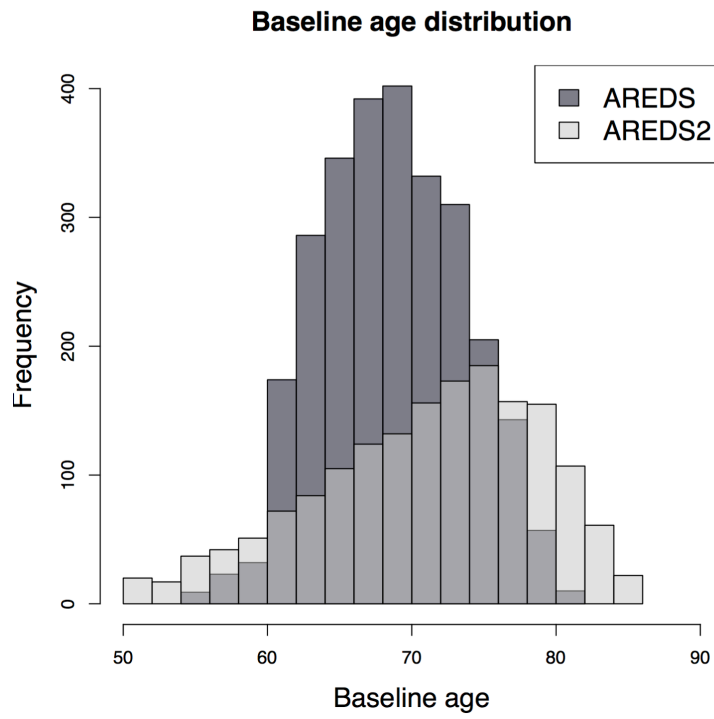

Figure S2: Distribution of the genetic risk score in AREDS and AREDS2.

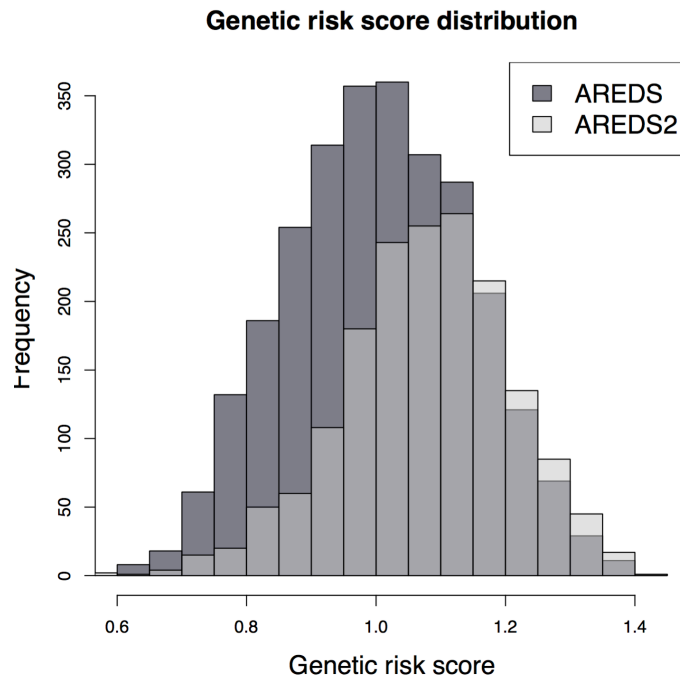

Figure S3: The corresponding forest plots for Table 4.

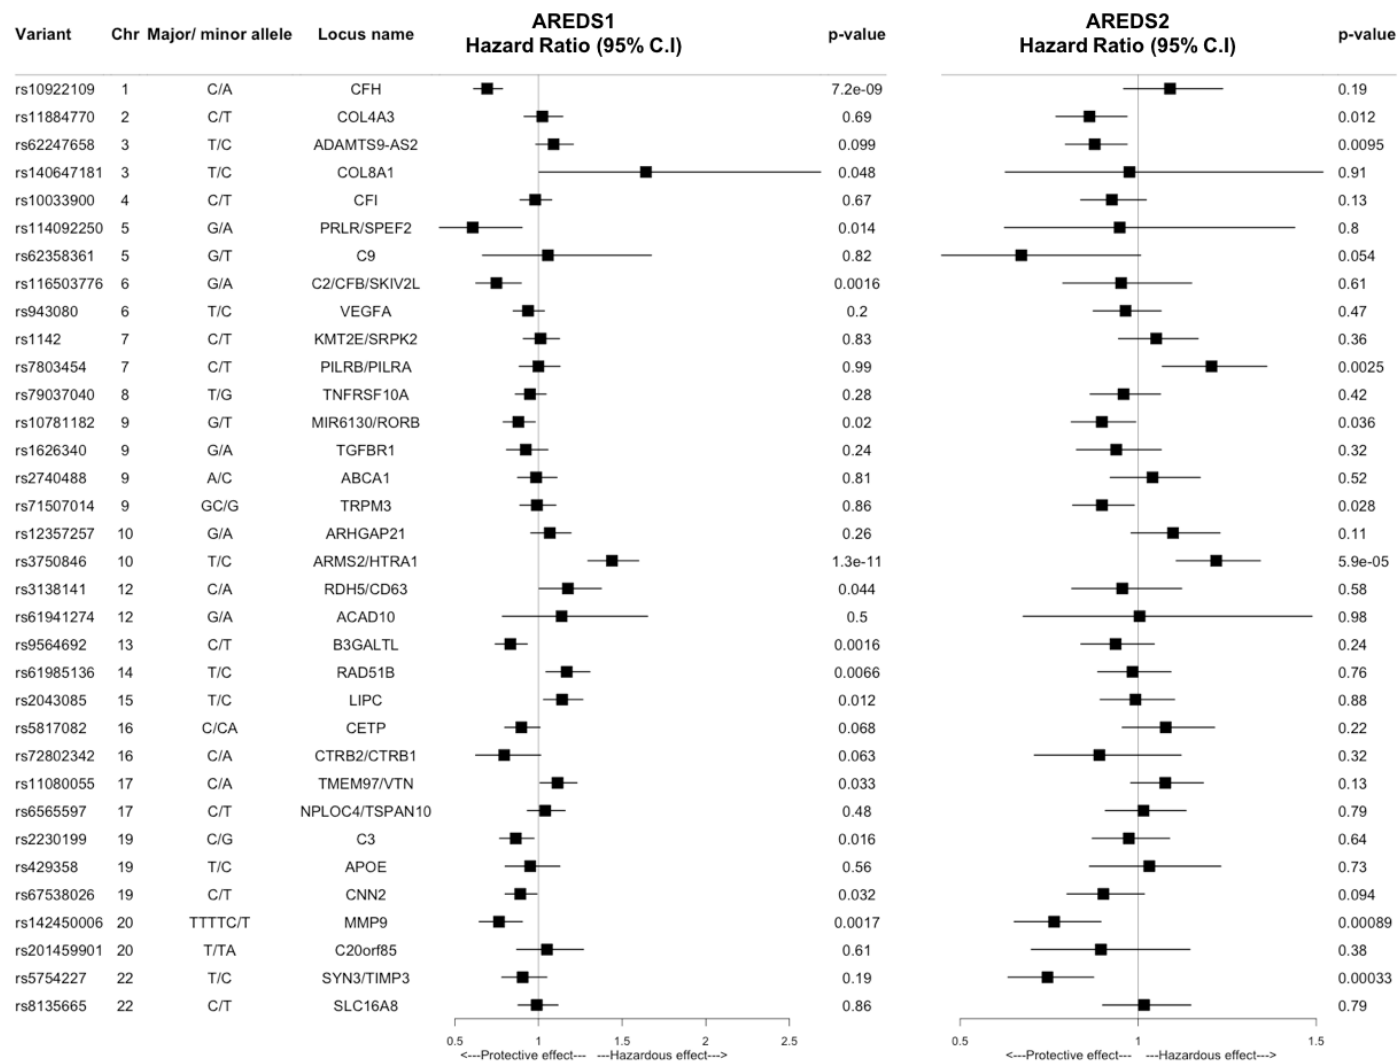

Figure S4: The corresponding forest plots for Table S1.

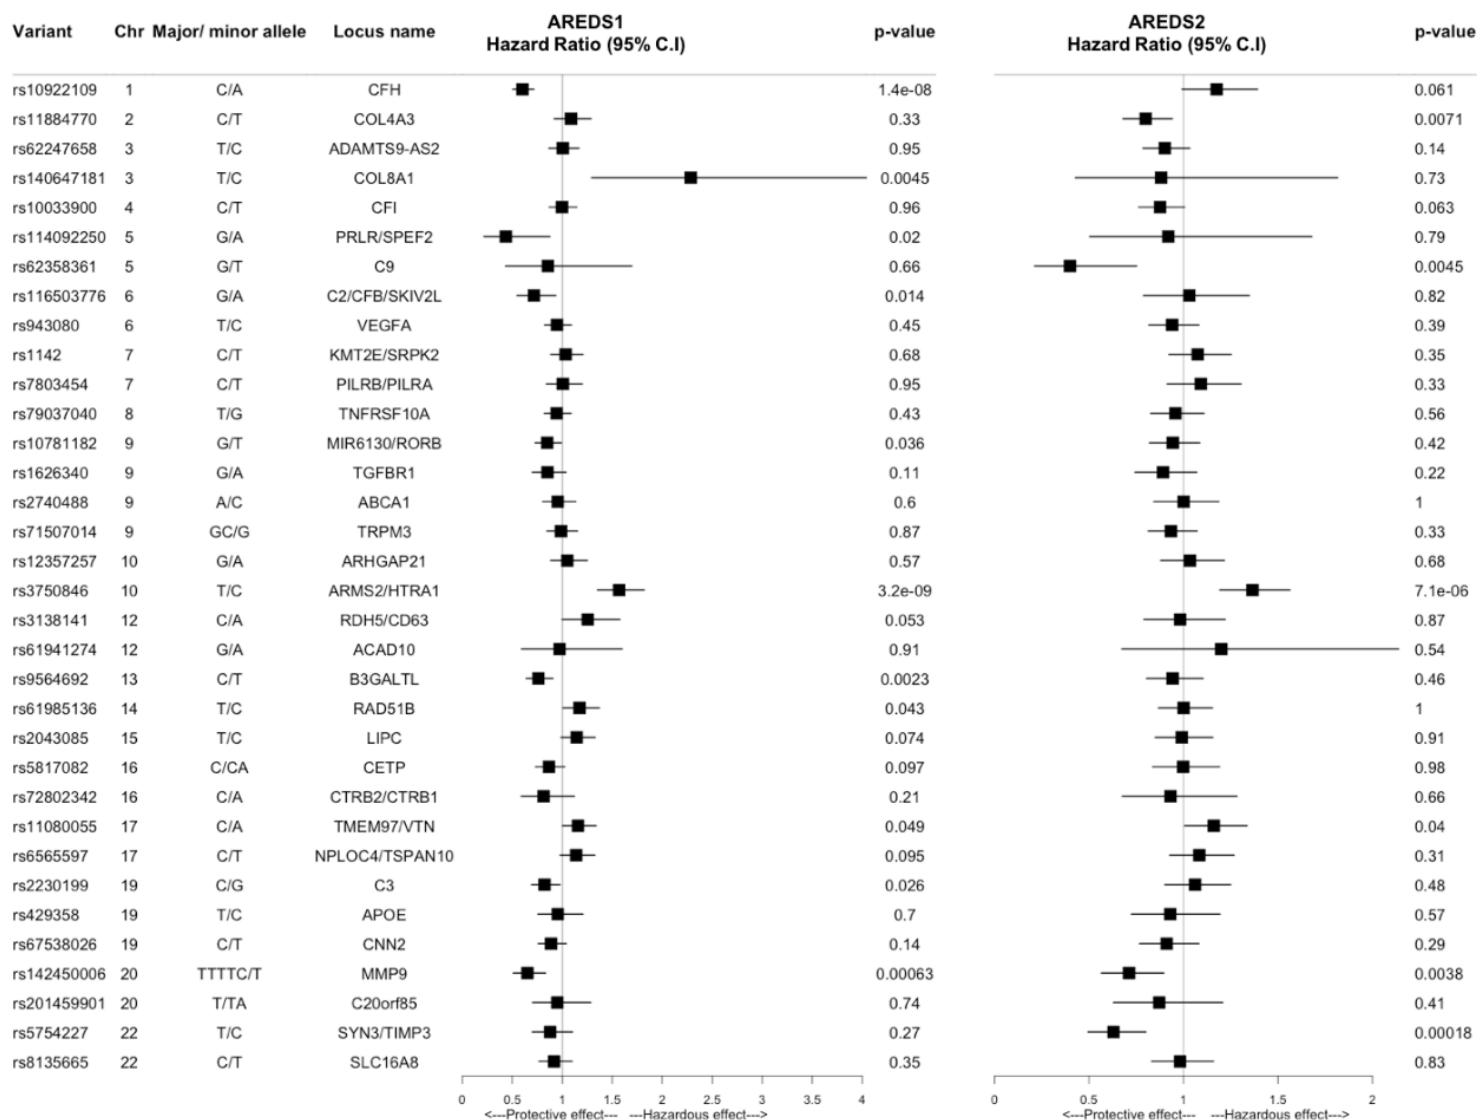



Figure S5: The corresponding forest plots for Table S2.

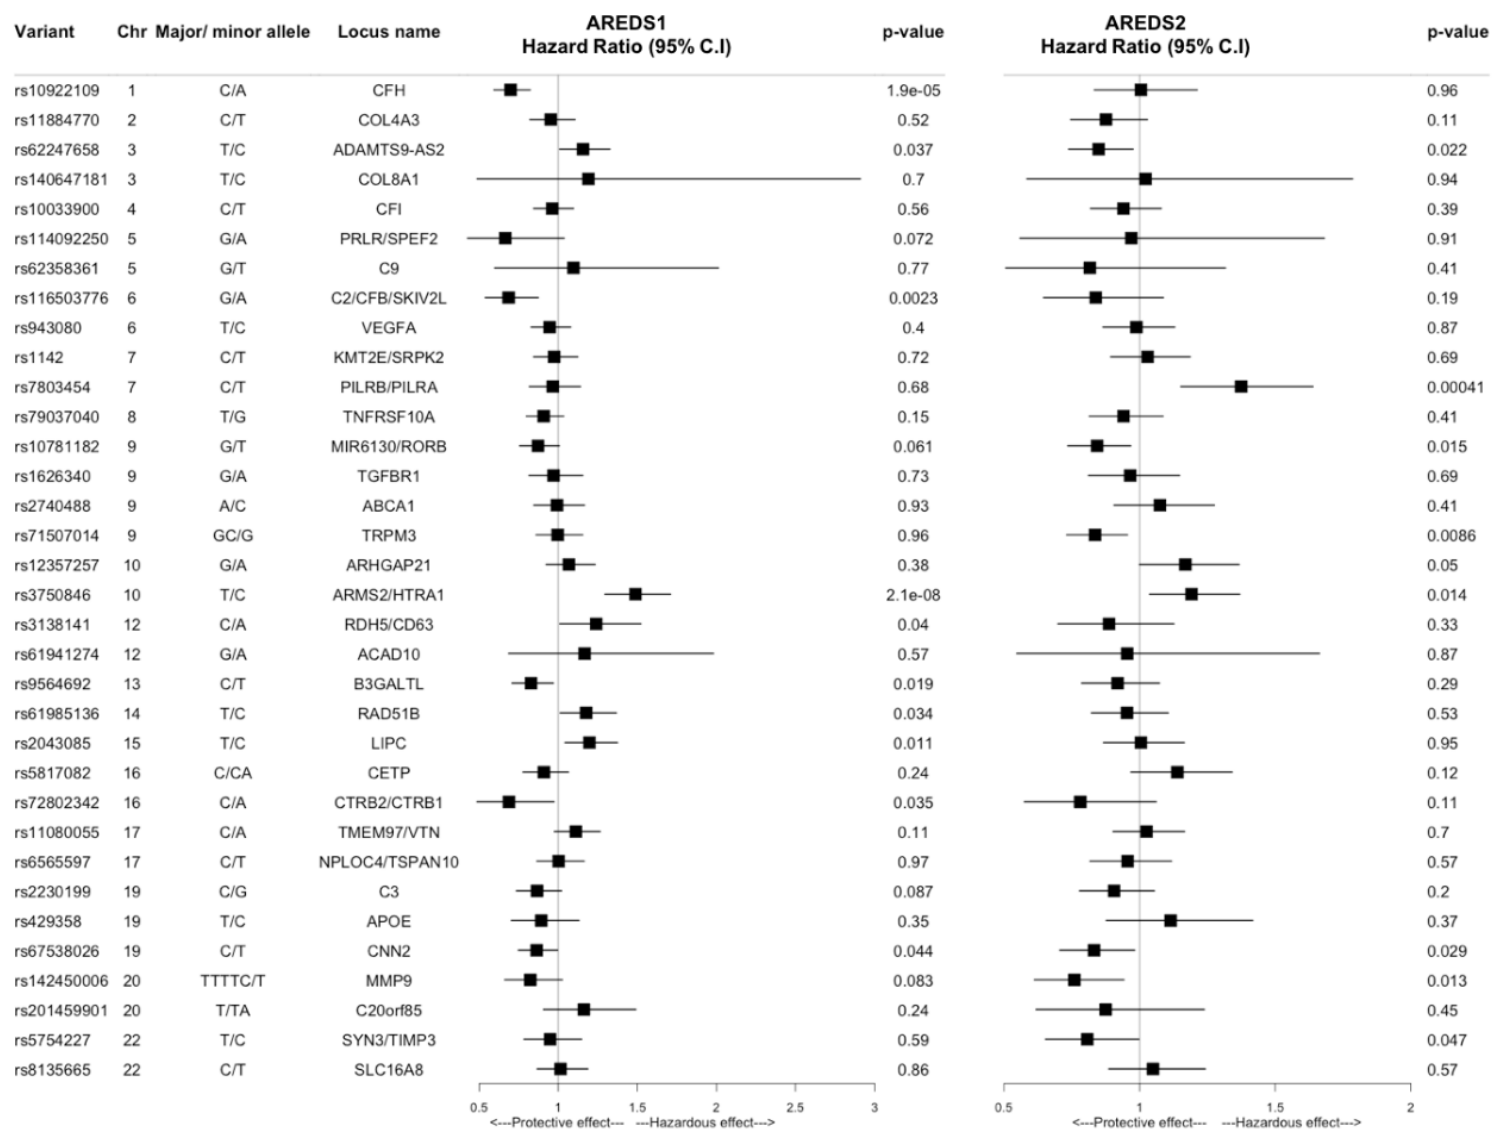

Figure S6: A: ROC curves for Model D in AREDS data; B: ROC curves for Model E in AREDS data.

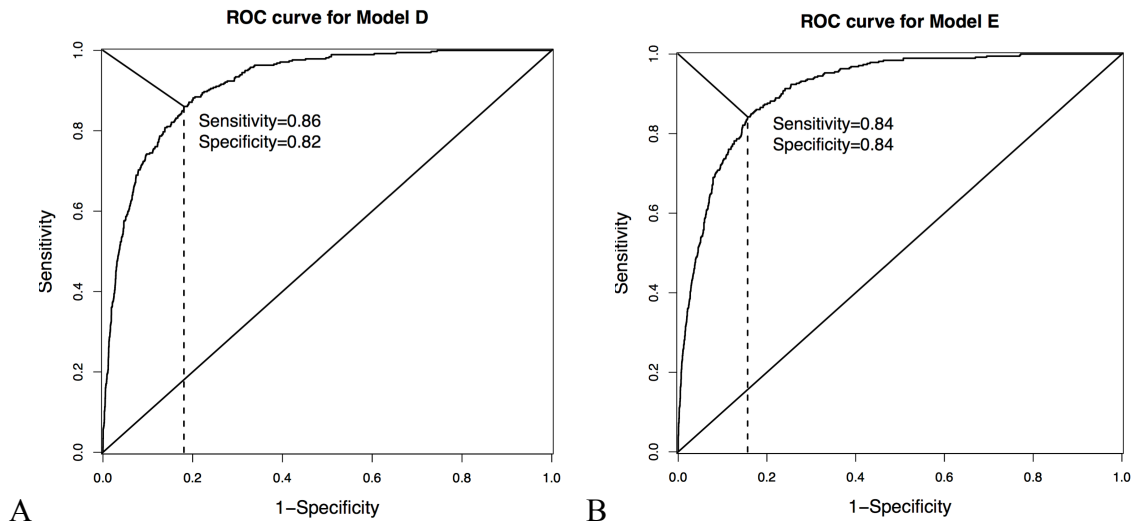

Supplement: 119file006.pdf [file 119file006.pdf]
